## Research Article

# Effects of DISC1 on Alzheimer's disease cell models assessed by iTRAQ proteomics analysis

Jiajie Lu<sup>1</sup>, Rihong Huang<sup>1</sup>, Yuecheng Peng<sup>1</sup>, Haojian Wang<sup>1</sup>, Zejia Feng<sup>1</sup>, Yongyang Fan<sup>1</sup>, Zhaorong Zeng<sup>1</sup>, Yezhong Wang<sup>1</sup>, Jiana Wei<sup>2</sup> and  Zhaotao Wang<sup>1</sup>

<sup>1</sup>Institute of Neuroscience, Department of Neurosurgery, The Second Affiliated Hospital of Guangzhou Medical University, Guangzhou 510260, China; <sup>2</sup>Institute of Neuroscience, Department of Neurology, The Second Affiliated Hospital of Guangzhou Medical University, Guangzhou 510260, China

**Correspondence:** Zhaotao Wang (wangzhaotao@gzhu.edu.cn) or Jiana Wei (923131571@qq.com) or Yezhong Wang (wangyezong@gzhu.edu.cn)

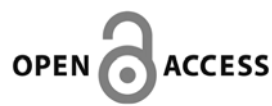

Alzheimer's disease (AD) is a form of neurodegenerative disease in the elderly with no cure at present. In a previous study, we found that the scaffold protein, disrupted in Schizophrenia 1 (DISC1) is down-regulated in the AD brains, and ectopic expression of DISC1 can delay the progression of AD by protecting synaptic plasticity and down-regulating BACE1. However, the underlying mechanisms remain not to be elucidated. In the present study, we compared the proteomes of normal and DISC1<sup>high</sup> AD cells expressing the amyloid precursor protein (APP) using isobaric tag for relative and absolute quantitation (iTRAQ) and mass spectrometry (MS). The differentially expressed proteins (DEPs) were identified, and the protein-protein interaction (PPI) network was constructed to identify the interacting partners of DISC1. Based on the interaction scores, NDE1, GRM3, PTGER3 and KATNA1 were identified as functionally or physically related to DISC1, and may therefore regulate AD development. The DEPs were functionally annotated by Gene Ontology (GO) and Kyoto Encyclopedia of Genes and Genomes (KEGG) databases with the DAVID software, and the Non-supervised Orthologous Groups (eggNOG) database was used to determine their evolutionary relationships. The DEPs were significantly enriched in microtubules and mitochondria-related pathways. Gene set enrichment analysis (GSEA) was performed to identify genes and pathways that are activated when DISC1 is overexpressed. Our findings provide novel insights into the regulatory mechanisms underlying DISC1 function in AD.

## Introduction

Alzheimer's disease (AD) is a highly prevalent neurodegenerative disease, and accounts for almost 80% of the dementia cases worldwide [1]. It commonly afflicts the elderly (>65 years), also known as the late-onset AD, and early-onset AD that affects those younger than 65 years of age is relatively rare [2]. It is characterized by the deposition of  $\beta$ -amyloid (A $\beta$ ) plaques and formation of neurofibrillary tangles (NFTs) of hyperphosphorylated tau protein, which impairs neuronal and synaptic functions [3–5].

Disrupted in Schizophrenia 1 (DISC1) is a multifunctional scaffold protein that is ubiquitous in the brain, and highly expressed in the temporal and para-hippocampal cortices, dentate gyrus of the hippocampus, and the white matter [6]. It interacts with multiple proteins involved in physiological processes such as neuron migration, neural progenitor cell (NPC) proliferation, neural signal transmission and synaptic functions, indicating a pathological role in neurodegeneration as well as a potential target for drug intervention [7]. Overexpression of DISC1 can reduce cognitive deficits and delay the progression of AD by protecting synaptic plasticity and down-regulating BACE1 [8,9]. However, the exact molecular mechanisms underlying the role of DISC1 in AD pathogenesis are unknown. To this end, we ectopically expressed DISC1 in the amyloid precursor protein (APP) cellular model of AD, and compared the proteomes of the control and overexpressing cells to identify the differentially expressed proteins (DEPs).

Received: 15 May 2021  
Revised: 21 December 2021  
Accepted: 23 December 2021

Accepted Manuscript online:  
04 January 2022  
Version of Record published:  
11 January 2022

Identifying proteins that interacted with DISC1 may reveal molecular mechanisms underlying DISC1 function in AD or other disorders.

## Materials and methods

### *In vitro* model of AD

The HEK293-APP cells were obtained from Institute of Neuroscience, Soochow University. The cells were transfected with the DISC1-overexpression (OE) and control lentiviruses (NC), and three replicates were used for each.

### Protein extraction and digestion

Total protein was extracted from the cells using RIPA buffer (Beyotime, China) according to the manufacturer's protocol, and enzymatically digested with the filter-aided sample preparation (FASP) method [10]. Aliquots of lysates were mixed with 200  $\mu$ l of 8 M urea in Nanosep Centrifugal Devices (PALL). The device was centrifuged at 14000  $\times$ g at 20°C for 20 min. All following centrifugation steps were performed applying the same conditions allowing maximal concentration. The concentrate was diluted with 200  $\mu$ l of 8 M urea in 0.1 M Tris-HCl, pH 8.5 and the device was centrifuged. Proteins were reduced with 10 mM DTT for 2 h at 56°C. Subsequently, the samples were incubated in 5 mM iodoacetamide for 30 min in the dark to block reduced cysteine residues followed by centrifugation. The resulting concentrate was diluted with 200  $\mu$ l of 8 M urea in 0.1 M Tris-HCl, pH 8.0 and concentrated again. This step was repeated two-times, and the concentrate was subjected to proteolytic digestion overnight at 37°C. The digests were collected by centrifugation, dried in a vacuum concentrator.

### Isobaric tag for relative and absolute quantitation labeling

The tryptic digestion peptides were labeled with 8plex isobaric tag for relative and absolute quantitation (iTRAQ) reagents according to the manufacturer's instructions (Sciex, Foster City, CA). The dried peptides were resuspended in 200 mM triethylammonium bicarbonate (TEAB) buffer. For 50  $\mu$ g peptide mixture per sample, half units of labeling reagent with respective isobaric tags from 113 to 119, which were dissolved in 140  $\mu$ l isopropanol, were added into each sample tube, then vortexed for 1 min and incubated at room temperature for 2 h. The reaction was stopped with 100  $\mu$ l high-performance liquid chromatography (HPLC) water for 30 min. The samples were labeled as (CON1)-113, (CON2)-114, (CON3)-115, (DISC1)-116, (DISC2)-117 and (DISC3)-118, (Mix)-119. Finally, all the samples were pooled and vacuum-dried for the next step.

### Peptides fractionation by high pH reversed-phase liquid chromatography

Agilent 1100 HPLC system was used for peptides chromatographic fractionation. The dried sample was suspended in 110  $\mu$ l solvent A (10 mM ammonium formate, 5% acetonitrile aqueous solution, pH = 10) and loaded on to an analytical C18 column (Zorbax Extended-C18, 2.1 $\times$ 150 mm, 5  $\mu$ m, Agilent). A total of 80 min separation procedure was carried out at a flow rate of 300  $\mu$ l/min with the monitoring wavelength of 215 nm, the elution gradient was set as follows: keep 5% solvent B (10 mM ammonium formate, 90% acetonitrile aqueous solution, pH = 10.0) for 5 min, increase from 5 to 38% solvent B in 60 min, from 38 to 90% B in 1 min, keep 90% B for 7 min, then equilibrate the column with 5% B for 7 min. A total of 48 fractions were evenly collected within the elution gradient starting from the 6 to 65<sup>th</sup> min, these 48 fractions were then pooled to generate the final 16 fractions using a nonadjacent pooling scheme (e.g., 1, 17, 49 pooled for final fraction 1; 2, 18, 50 pooled for final fraction 2). All the fractions were then dried in a vacuum for nano ESI-LC-MS/MS analysis.

### Nano ESI-LC-MS/MS analysis

The lyophilized peptide fractions were resuspended in ddH<sub>2</sub>O containing 0.1% formic acid, and 2  $\mu$ l aliquots which were loaded into a nanoViper C18 (3  $\mu$ m, 100 Å) trap column. The online chromatography separation was performed on the Easy nLC 1200 system (Thermo Fisher). The trapping, desalting procedure were carried out with a volume of 20  $\mu$ l of 100% solvent A (0.1% formic acid). Then, an elution gradient of 8–38% solvent B (80% acetonitrile, 0.1% formic acid) at a flow rate of 300 nl/min (0–40 min, 5–38% B; 40–42 min, 38–100% B; 42–50 min, 100% B) in 60 min was used on an analytical column (50  $\mu$ m  $\times$  15 cm C18-3  $\mu$ m 100 Å). Data-dependent acquisition (DDA) mass spectrum techniques were used to acquire tandem MS data on a Thermo Fisher Q Exactive mass spectrometer (Thermo Fisher, U.S.A.) fitted with a Nano Flex ion source. Data were acquired using an ion spray voltage of 1.9 kV, and an interface heater temperature of 275°C. The mass spectrometry (MS) was operated with FULL-MS scans. For DDA, survey scans were acquired in 250 ms and up to 20 product ion scans (50 ms) were collected. Only spectra with a charge state of 2–4 were selected for fragmentation by higher energy collision energy. Dynamic exclusion was set for 25.

## Identification analysis and quantitative analysis

The MS converter software (Version 1.3 beta Sciex) was used to convert the raw MS data into an open data format for subsequent analysis. Proteins were identified using the iPEAK tool that can combine results from multiple MS/MS search engines, including MSGFDB, X!tandem and MyriMatch [11]. The local false discovery rate (FDR) was 1% after searching against the amino acid sequences with a maximum of two missed cleavages and one missed termini cleavage (semityptic digest). The following parameters were set for database searching: trypsin digestion, carbamidomethylation (C) of cysteine, iTRAQ8plex (N-term, K) as a fixed modification, and oxidation (M) and iTRAQ8plex (Y) as variable modifications. Precursor and fragment mass tolerance were set to 20 ppm and 0.05 Da, respectively. IQuant was used to quantify the labeled peptides with isobaric tags [12] using the following parameters: Quant\_peptide of all unique peptides, Quant\_number of at least one unique spectrum, variance stabilization normalization, Protein\_Ratio of weighted average, and *t* test for Statistical Analysis. For protein abundance ratios, fold-changes  $\geq 1.2$  (or  $\leq 0.833$ ) and *P*-values  $< 0.05$  were the thresholds for statistical significance. The data were searched in the UniProt database using *Homo sapiens* (human) taxonomy (<https://www.uniprot.org/proteomes/UP000005640>).

## Protein–protein interaction network construction

The STRING (version: 11.0b, <https://string-db.org>) search tool [13] was used to identify the key interacting proteins upstream and downstream of DISC1. Briefly, DEPs are imported into the database, and protein pairs with a total score  $> 0.4$  were used to construct the protein–protein interaction (PPI) network that was further visualized by Cytoscape.

## Gene Ontology, Kyoto Encyclopedia of Genes and Genomes and non-supervised Orthologous Groups analyses

Gene Ontology (GO), Kyoto Encyclopedia of Genes and Genomes (KEGG) and Non-supervised Orthologous Groups (eggNOG) analyses were performed using Bubble and Barplot Color Group tools in Hiplot basic model (<https://hiplot.com.cn>).

## Enrichment statistical analysis of DEPs

The target genes and their associated functions were identified from GO database based on the biological process (BP), molecular function (MF) and cellular component (CC) categories. The various pathways involved in the DEPs were identified using the KEGG database. DAVID database tool (<https://david.ncifcrf.gov/>) [14,15] was used to identify the significantly enriched functions and pathways with  $P < 0.05$  as the threshold. The evolutionary genealogy of genes encoding for the DEPs was analyzed using the eggNOG [16] database with  $P < 0.05$  as statistically significant.

## Gene set enrichment analysis

Gene set enrichment analysis (GSEA) was performed to screen for the gene sets and pathways enriched in the DISC1<sup>high</sup> AD cells to identify genes associated with disease progression [17,18]. R clusterProfiler package [19] was used for GSEA on the basis of BP, MF, CC and KEGG categories. For each analysis, gene set permutations were implemented 5000 times. Gene sets with a FDR  $< 0.05$  and adjusted *P*-value  $< 0.05$  were considered significantly enriched. The workflow of the study is outlined in Figure 1.

## Results

### DEPs screening and PPI network construction

Firstly, we detected the DISC1 expression level after overexpression of DISC1 in HEK-APP cells by Western blot. And we found DISC1 is up-regulated in HEK-APP cells compared with the control group (Supplementary Figure S1). Besides, according the results from our proteomics, DISC1 is overexpressed  $\sim 2.18$ -folds than the control group. Then, a total of 351 DEPs (Supplementary Table S1) were identified in the DISC1<sup>high</sup> AD cells relative to the control cells, and the top 20 up-regulated and down-regulated proteins are listed in Tables 1 and 2, respectively. The PPI network of the DEPs was then constructed using the STRING database to identify interacting partners (Figure 2A). As shown in Figure 2B, DISC1 directly or indirectly interacts with NDE1, GRM3, PTGER3 and KATNA1 at a physical and/or functional level.

### Enrichment analysis of DEPs

The DEPs were functionally annotated with GO, KEGG and eggNOG enrichment analyses. As shown in Figure 3A, the DEPs were significantly enriched in transcription, mitochondrial promoter, intermediate filament cytoskeleton

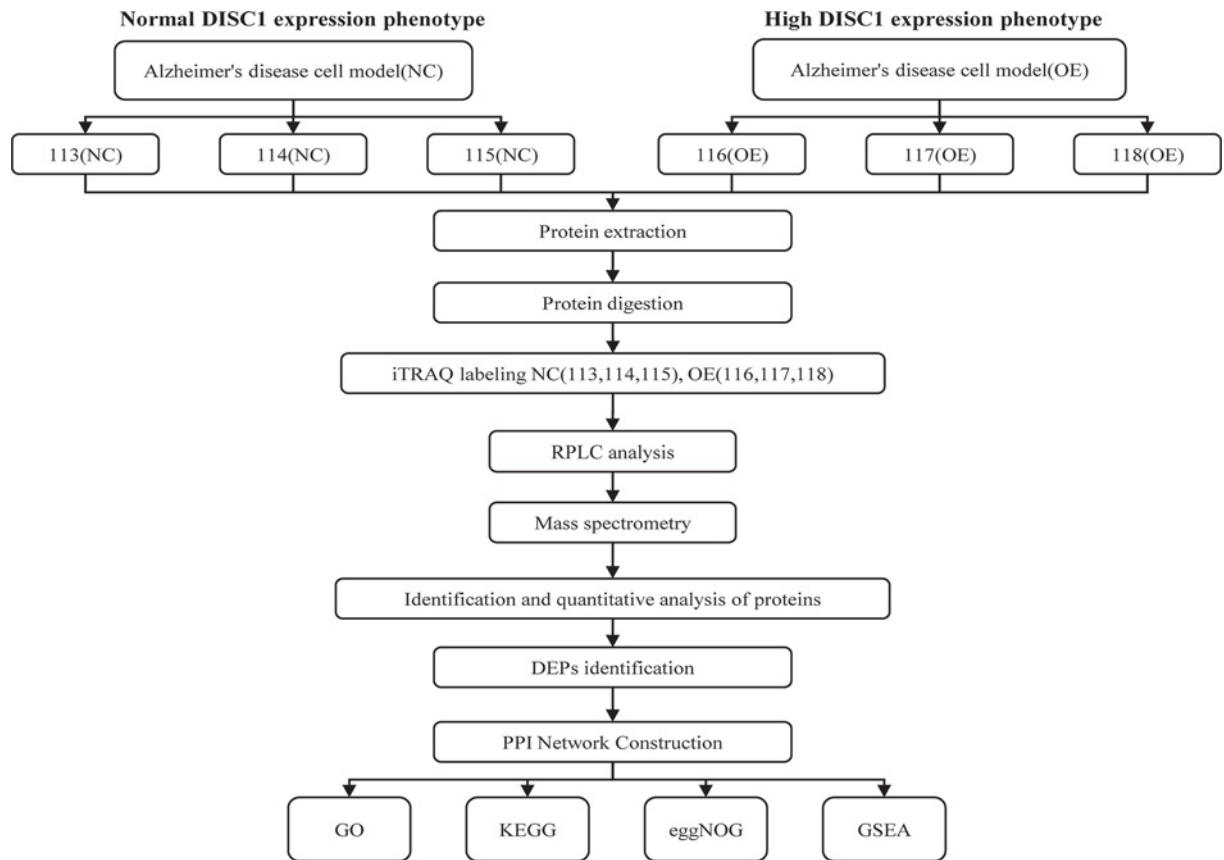

Figure 1. Schematic representation of the experimental design

Table 1 Top 20 up-regulated DEPs in AD cells overexpressing DISC1

| Protein ID | Gene symbol      | Description                                               | Mean ratio  |
|------------|------------------|-----------------------------------------------------------|-------------|
| MRPL14     | <i>PFN3</i>      | Profilin-3                                                | 2.663172018 |
| P62273     | <i>RPS29</i>     | 40S ribosomal protein S29                                 | 2.481425328 |
| Q9NRI5     | <i>DISC1</i>     | Disrupted in schizophrenia 1 protein                      | 2.175152568 |
| Q9UK76     | <i>JPT1</i>      | Jupiter microtubule-associated homolog 1                  | 2.129304373 |
| D6RIA3     | <i>C4orf54</i>   | Uncharacterized protein C4orf54                           | 1.976621657 |
| Q6P1L8     | <i>MRPL14</i>    | 39S ribosomal protein L14, mitochondrial                  | 1.946385443 |
| Q71DI3     | <i>HIST2H3A</i>  | Histone H3.2                                              | 1.807106261 |
| P05160     | <i>F13B</i>      | Coagulation factor XIII B chain                           | 1.656737482 |
| Q93077     | <i>HIST1H2AC</i> | Histone H2A type 1-C                                      | 1.604556122 |
| Q8WVG1     | <i>RSAD2</i>     | Radical S-adenosyl methionine domain-containing protein 2 | 1.593975355 |
| P82921     | <i>MRPS21</i>    | 28S ribosomal protein S21, mitochondrial                  | 1.577483389 |
| O75037     | <i>KIF21B</i>    | Kinesin-like protein KIF21B                               | 1.570883653 |
| Q9UK80     | <i>USP21</i>     | Ubiquitin carboxyl-terminal hydrolase 21                  | 1.566709143 |
| P52926     | <i>HMGA2</i>     | High mobility group protein HMGI-C                        | 1.56653705  |
| Q9BY77     | <i>POLDIP3</i>   | Polymerase $\delta$ -interacting protein 3                | 1.562567582 |
| Q9Y6C2     | <i>EMILIN1</i>   | EMILIN-1                                                  | 1.562523246 |
| O00488     | <i>ZNF593</i>    | Zinc finger protein 593                                   | 1.561342328 |
| Q9H446     | <i>RWDD1</i>     | RWD domain-containing protein 1                           | 1.551293724 |
| Q9NW61     | <i>PLEKHJ1</i>   | Pleckstrin homology domain-containing family J member 1   | 1.544695272 |
| Q13442     | <i>PDAP1</i>     | 28 kDa heat- and acid-stable phosphoprotein               | 1.542954482 |

(A)

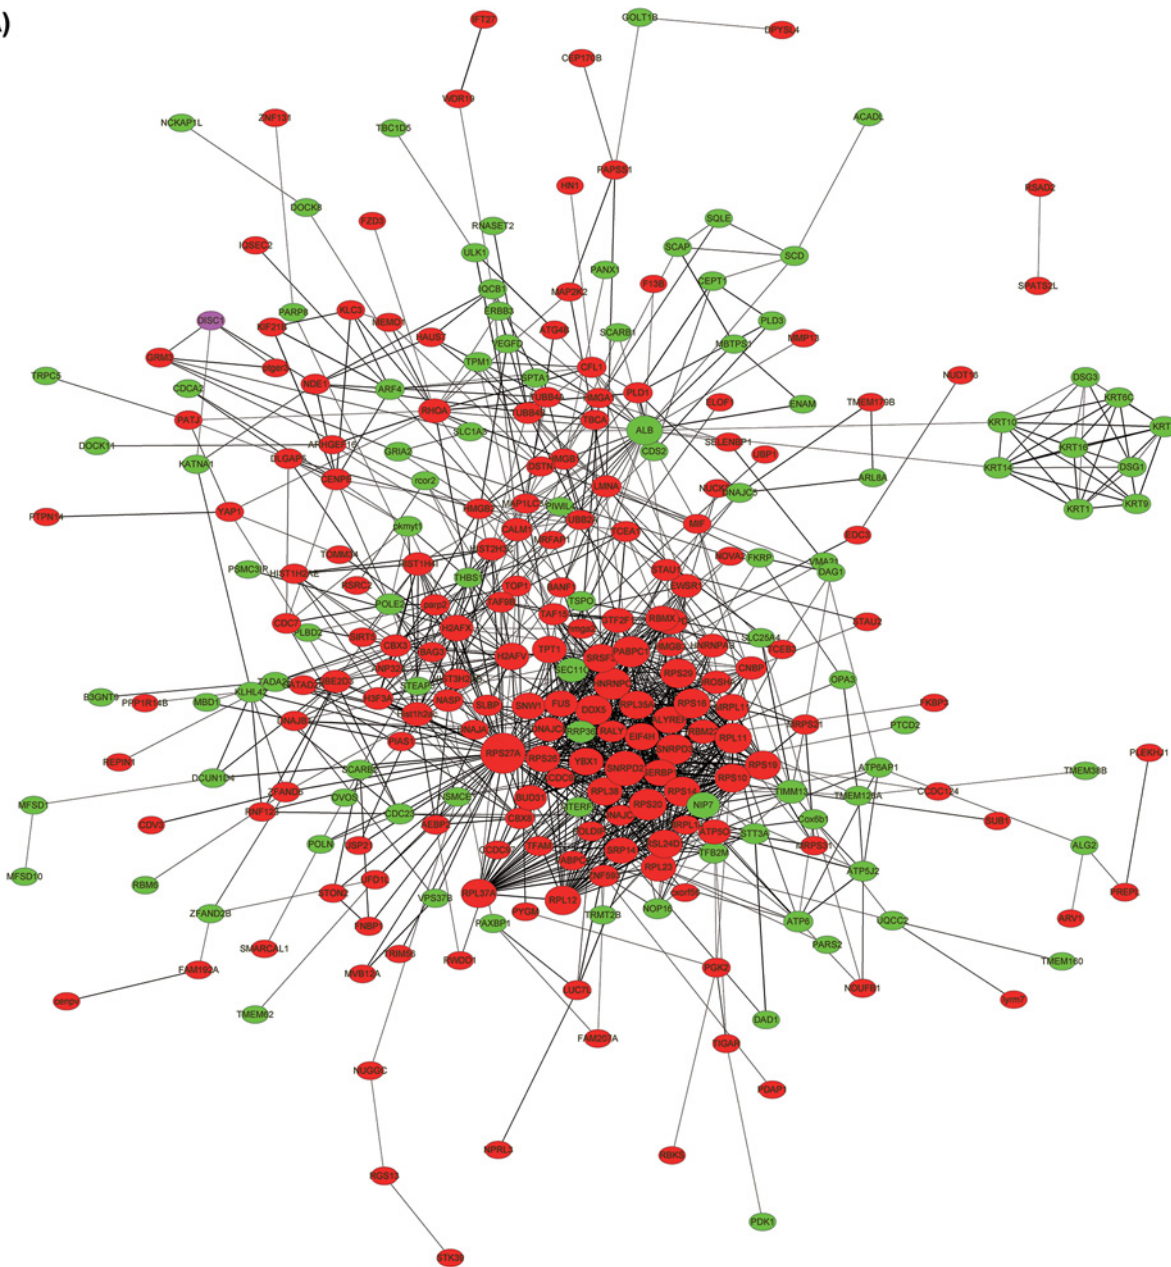

(B)

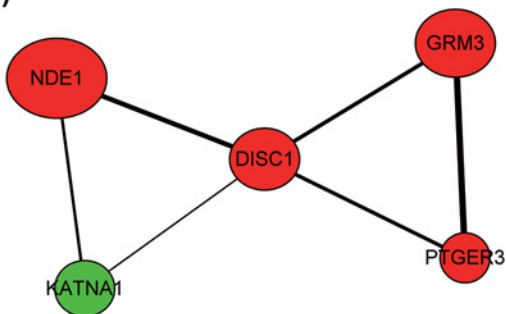

**Figure 2. PPI network of DEPs**

(A) The PPI network of DEPs was constructed by STRING and Cytoscape. Red nodes indicate up-regulated genes, green nodes indicate down-regulated genes. The node size correlates to the degree of connectivity and line thickness with interaction score. DISC1 is marked in purple in the upper left corner. (B) Proteins with physical or functional association with DISC1.

**Table 2 Top 20 down-regulated DEPs in AD cells overexpressing DISC1**

| Protein ID | Gene symbol    | Description                                               | Mean ratio  |
|------------|----------------|-----------------------------------------------------------|-------------|
| Q95674     | <i>CDS2</i>    | Phosphatidate cytidyltransferase 2                        | 0.490415498 |
| Q9H8M5     | <i>CNNM2</i>   | Metal transporter CNNM2                                   | 0.537252179 |
| P78369     | <i>CLDN10</i>  | Claudin-10                                                | 0.553699125 |
| Q9UL62     | <i>TRPC5</i>   | Short transient receptor potential channel 5              | 0.560397651 |
| Q92858     | <i>ATOH1</i>   | Protein atonal homolog 1                                  | 0.561748688 |
| P48668     | <i>KRT6C</i>   | Keratin, type II cytoskeletal 6C                          | 0.56390028  |
| P51786     | <i>ZNF157</i>  | Zinc finger protein 157                                   | 0.586087661 |
| P13647     | <i>KRT5</i>    | Keratin, type II cytoskeletal 5                           | 0.611197075 |
| Q5HY64     | <i>FAM47C</i>  | Putative protein FAM47C                                   | 0.625502861 |
| P08779     | <i>KRT16</i>   | Keratin, type I cytoskeletal 16                           | 0.633121401 |
| P21860     | <i>ERBB3</i>   | Receptor tyrosine-protein kinase erbB-3                   | 0.643736939 |
| P04264     | <i>KRT1</i>    | Keratin, type II cytoskeletal 1                           | 0.656660409 |
| P78332     | <i>RBM6</i>    | RNA-binding protein 6                                     | 0.656667186 |
| Q96EU6     | <i>RRP36</i>   | Ribosomal RNA processing protein 36 homolog               | 0.680711277 |
| Q9NX00     | <i>TMEM160</i> | Transmembrane protein 160                                 | 0.685147795 |
| Q92564     | <i>DCUN1D4</i> | DCN1-like protein 4                                       | 0.691796699 |
| Q9P003     | <i>CNIH4</i>   | Protein cornichon homolog 4                               | 0.696978494 |
| P80365     | <i>HSD11B2</i> | Corticosteroid 11-beta-dehydrogenase isozyme 2            | 0.700629987 |
| P28330     | <i>ACADL</i>   | Long-chain specific acyl-CoA dehydrogenase, mitochondrial | 0.707497167 |
| Q02413     | <i>DSG1</i>    | Desmoglein-1                                              | 0.707750707 |

organization, microtubule, mitochondrial inner membrane and mitochondrion etc. Furthermore, KEGG pathway analysis further showed that the ribosome, spliceosome, systemic lupus erythematosus, protein processing in the endoplasmic reticulum and Alcoholism pathways were significantly associated with the DEPs (Figure 3B) In addition, eggNOG enrichment analyses showed that posttranslational modification and translation were closely related to the DEPs (Figure 3C). The results are summarized in Table 3.

### Identification of AD-related genes associated with DISC1

GSEA was performed to identify the AD-related gene sets in the DISC1<sup>high</sup> AD cells. Significant differences were observed in the enriched GO terms and KEGG pathways of the DISC1<sup>low</sup> and DISC1<sup>high</sup> datasets. Microtubule-based process, microtubule cytoskeleton organization, mitochondrial transmembrane transport, transmembrane transport and oxidation–reduction were the significantly enriched BP categories in DISC1<sup>high</sup> cells (Figure 4A), and the top five MF categories were cytoskeletal protein binding, calcium ion transmembrane transporter activity, heat shock protein (Hsp) binding, calcium ion binding and tubulin binding (Figure 4B). In addition, the DISC1<sup>high</sup> phenotype showed significant enrichment of microtubule, cytoplasmic stress granule, microtubule-associated complex, kinesin complex and microtubule organizing center, along with a significant negative correlation with mitochondrial matrix, mitochondrial inner membrane component, inner mitochondrial membrane protein complex and mitochondrial protein complex (Figure 4C). Five REACTOME categories including nervous system development, post-chaperonin tubulin folding pathway, aggrephagy, Hsp90 chaperone cycle for steroid hormone receptors SHR, and the assembly and cell surface presentation of NMDA receptor were significantly enriched in the DISC1<sup>high</sup> phenotype. While, mitochondrial protein import, respiratory electron transport ATP synthesis by chemiosmotic coupling and heat production by uncoupling proteins, and the citric acid TCA cycle and respiratory electron transport were negatively associated with this phenotype (Figure 4D). The results are summarized in Table 4.

### Discussion

AD is the main cause of dementia and is a considerable socioeconomic burden worldwide [20]. The histological hallmarks of AD are extracellular accumulation of senile Aβ plaques, formation of intracellular NFTs, and glial cell-mediated inflammation [21,22]. However, the molecular mechanisms driving the pathophysiology of AD have

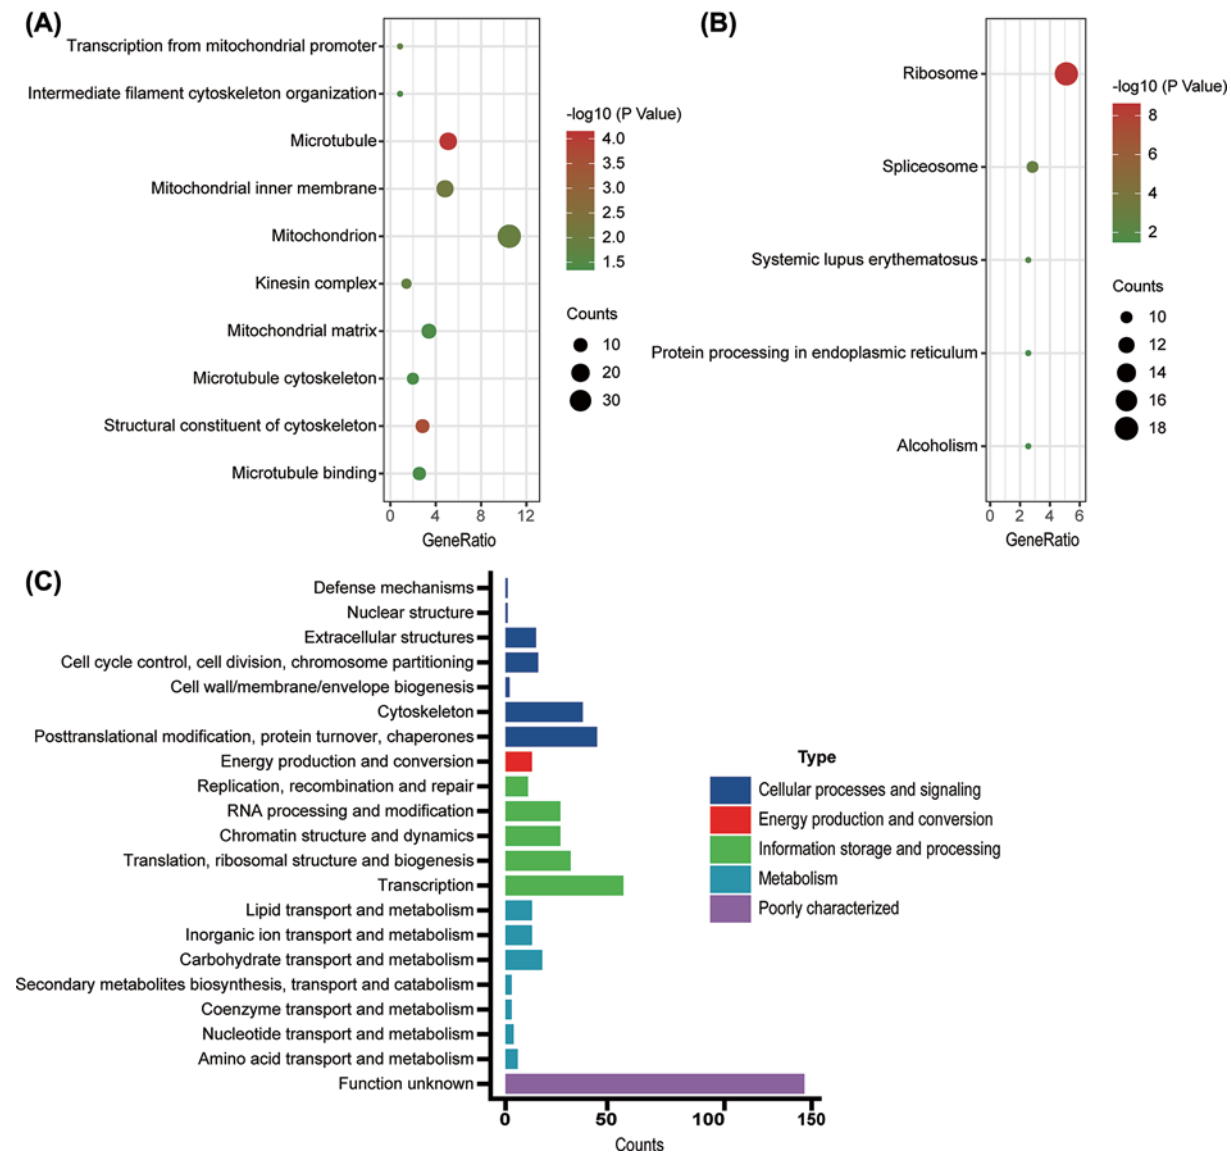

**Figure 3. The enrichment analysis of DEPs**

Functional enrichment analysis of GO (A). Functional enrichment analysis of KEGG (B). Functional enrichment analysis of eggNOG (C).

not completely elucidated. We previously showed that DISC1 slowed AD development by protecting synaptic plasticity and down-regulating BACE1 [8,9]. In the present study, we compared the proteomes of DISC1<sup>low</sup> and DISC1<sup>high</sup> AD cells to identify the proteins differentially expressed in response to DISC1 up-regulation. Through bioinformatics analysis, we identified key DISC1-interacting proteins and pathways, mostly related to microtubules and mitochondria, that likely play important roles in the progression of AD.

Several studies have implicated microtubules in neurodegenerative diseases. Zempel et al. showed that the loss of microtubules is a risk factor in the progression of AD [23]. In our study, the DEPs and the gene sets correlated to DISC1 were significantly enriched in the microtubule and cytoskeleton-related functions and pathways. Furthermore, NDE1 and KATNA1, the proteins with high interaction score with DISC1, are involved in the microtubule and microtubule-binding pathways. Studies show that NDE1 is aberrantly expressed in neurological and psychiatric disorders [24,25], and binds to DISC1 to mediate the latter's role in neurogenesis and neural development [7,26]. In addition, KATNA1 regulates neuronal progenitor proliferation during embryonic development and adult neurogenesis

**Table 3** GO and KEGG pathway analyses of hub genes

| Category         | Term                                                       | Counts | GeneRatio | P-value  |
|------------------|------------------------------------------------------------|--------|-----------|----------|
| GOTERM_BP_DIRECT | GO:0006390~transcription from mitochondrial promoter       | 3      | 0.849858  | 0.014464 |
| GOTERM_BP_DIRECT | GO:0045104~intermediate filament cytoskeleton organization | 3      | 0.849858  | 0.031722 |
| GOTERM_CC_DIRECT | GO:0005874~microtubule                                     | 18     | 5.09915   | 7.06E-05 |
| GOTERM_CC_DIRECT | GO:0005743~mitochondrial inner membrane                    | 17     | 4.815864  | 0.008035 |
| GOTERM_CC_DIRECT | GO:0005739~mitochondrion                                   | 37     | 10.48159  | 0.013376 |
| GOTERM_CC_DIRECT | GO:0005871~kinesin complex                                 | 5      | 1.416431  | 0.016361 |
| GOTERM_CC_DIRECT | GO:0005759~mitochondrial matrix                            | 12     | 3.399433  | 0.041063 |
| GOTERM_CC_DIRECT | GO:0015630~microtubule cytoskeleton                        | 7      | 1.983003  | 0.041571 |
| GOTERM_MF_DIRECT | GO:0005200~structural constituent of cytoskeleton          | 10     | 2.832861  | 2.45E-04 |
| GOTERM_MF_DIRECT | GO:0008017~microtubule binding                             | 9      | 2.549575  | 0.045076 |
| KEGG_PATHWAY     | hsa03010:Ribosome                                          | 18     | 5.09915   | 2.44E-09 |
| KEGG_PATHWAY     | hsa03040:Spliceosome                                       | 10     | 2.832861  | 0.001809 |
| KEGG_PATHWAY     | hsa05322:Systemic lupus erythematosus                      | 9      | 2.549575  | 0.006885 |
| KEGG_PATHWAY     | hsa04141:Protein processing in endoplasmic reticulum       | 9      | 2.549575  | 0.025116 |
| KEGG_PATHWAY     | hsa05034:Alcoholism                                        | 9      | 2.549575  | 0.031921 |

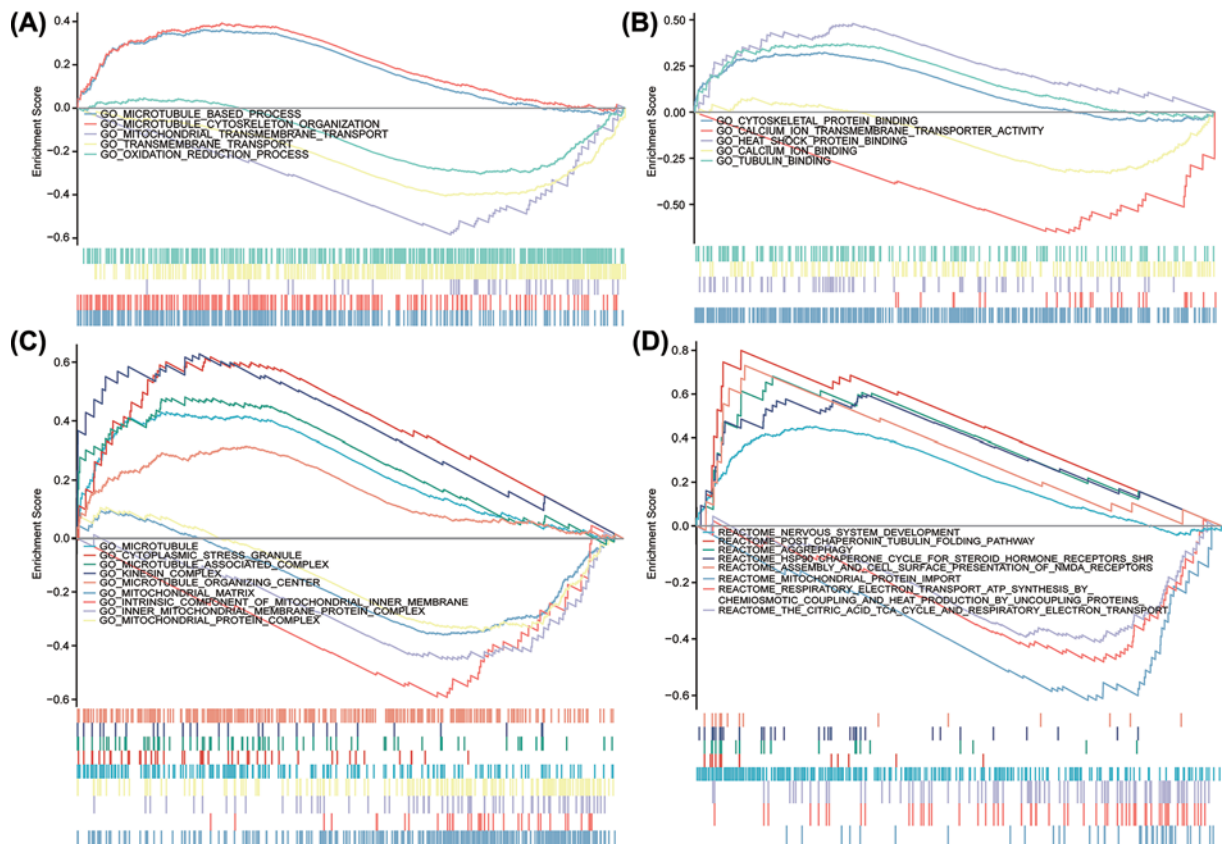

**Figure 4.** Enrichment plots from GSEA in *DISC1*<sup>high</sup> phenotype. GSEA results showing DEPs in BP (A), MF (B), CC (C) and REACTOME (D). All results of GSEA were based on NES, adjusted P-value and FDR value.



**Table 4 Gene sets enriched in high DISC1 expression phenotype**

| Gene set name                                                                                                             | NES    | P.adjust | FDR   |
|---------------------------------------------------------------------------------------------------------------------------|--------|----------|-------|
| BP                                                                                                                        |        |          |       |
| GO_MICROTUBULE_BASED_PROCESS                                                                                              | 1.619  | 0.032    | 0.03  |
| GO_MICROTUBULE_CYTOSKELETON_ORGANIZATION                                                                                  | 1.695  | 0.032    | 0.03  |
| GO_MITOCHONDRIAL_TRANSMEMBRANE_TRANSPORT                                                                                  | -2.064 | 0.032    | 0.03  |
| GO_TRANSMEMBRANE_TRANSPORT                                                                                                | -2.015 | 0.035    | 0.032 |
| GO_OXIDATION_REDUCTION_PROCESS                                                                                            | -1.524 | 0.035    | 0.032 |
| MF                                                                                                                        |        |          |       |
| GO_CYTOSKELETAL_PROTEIN_BINDING                                                                                           | 1.472  | 0.011    | 0.009 |
| GO_CALCIIUM_IION_TRANSMEMBRANE_TRANSPORTER_ACTIVITY                                                                       | -2.085 | 0.011    | 0.009 |
| GO_HEAT_SHOCK_PROTEIN_BINDING                                                                                             | 1.748  | 0.031    | 0.025 |
| GO_CALCIIUM_IION_BINDING                                                                                                  | -1.481 | 0.038    | 0.031 |
| GO_TUBULIN_BINDING                                                                                                        | 1.533  | 0.047    | 0.038 |
| CC                                                                                                                        |        |          |       |
| GO_MICROTUBULE                                                                                                            | 1.813  | 0.011    | 0.009 |
| GO_CYTOPLASMIC_STRESS_GRANULE                                                                                             | 2.059  | 0.011    | 0.009 |
| GO_MICROTUBULE_ASSOCIATED_COMPLEX                                                                                         | 1.783  | 0.015    | 0.012 |
| GO_KINESIN_COMPLEX                                                                                                        | 1.928  | 0.015    | 0.012 |
| GO_MICROTUBULE_ORGANIZING_CENTER                                                                                          | 1.401  | 0.049    | 0.04  |
| GO_MITOCHONDRIAL_MATRIX                                                                                                   | -1.754 | 0.014    | 0.011 |
| GO_INTRINSIC_COMPONENT_OF_MITOCHONDRIAL_INNER_MEMBRANE                                                                    | -1.971 | 0.018    | 0.015 |
| -GO_INNER_MITOCHONDRIAL_MEMBRANE_PROTEIN_COMPLEX                                                                          | -1.725 | 0.018    | 0.015 |
| GO_MITOCHONDRIAL_PROTEIN_COMPLEX                                                                                          | -1.548 | 0.026    | 0.021 |
| REACTOME                                                                                                                  |        |          |       |
| REACTOME_NERVOUS_SYSTEM_DEVELOPMENT                                                                                       | 2.004  | 0.021    | 0.019 |
| REACTOME_POST_CHAPERONIN_TUBULIN_FOLDING_PATHWAY                                                                          | 1.947  | 0.021    | 0.019 |
| REACTOME_AGGREPHAGY                                                                                                       | 1.946  | 0.037    | 0.032 |
| REACTOME_HSP90_CHAPERONE_CYCLE_FOR_STEROID_HORMONE_RECEPTORS_SHR                                                          | 1.89   | 0.045    | 0.04  |
| REACTOME_ASSEMBLY_AND_CELL_SURFACE_PRESENTATION_OF_NMDA_RECEPTORS                                                         | 1.885  | 0.045    | 0.04  |
| REACTOME_MITOCHONDRIAL_PROTEIN_IMPORT                                                                                     | -2.097 | 0.021    | 0.019 |
| REACTOME_RESPIRATORY_ELECTRON_TRANSPORT_ATP_SYNTHESIS_BY_CHEMIOSMOTIC_COUPLING_AND_HEAT_PRODUCTION_BY_UNCOUPLING_PROTEINS | -1.782 | 0.045    | 0.04  |
| REACTOME_THE_CITRIC_ACID_TCA_CYCLE_AND_RESPIRATORY_ELECTRON_TRANSPORT                                                     | -1.676 | 0.048    | 0.042 |

Abbreviations: NES, normalized enrichment score; P.adjust, adjusted P-value.

[27]. Thus, DISC1 may directly or indirectly regulate NDE1 and KATNA1, and the downstream microtubule-related pathways to slow down the progression of AD.

The mitochondrial cascade hypothesis for AD was first proposed in 2004, and considers mitochondrial dysfunction as the prerequisite of events leading to AD [3]. Several studies have subsequently shown that mitochondrial dysfunction and oxidative stress play a central role in AD pathogenesis [28–31]. In our previous study, we reported that DISC1 functions as a mitophagy receptor that can clear the dysfunctional mitochondria [8]. In this study, we found that DEPs were significantly enriched in mitochondria-related functions and pathways. In addition, the negative NES values of these pathways in GSEA indicated that mitochondria-related functions are inhibited when DISC1 is highly expressed. Furthermore, cytoplasmic stress granule was an enriched CC category in GSEA, which is indicative of oxidative stress in the cytoplasm of AD cells. Therefore, DISC1 slows the progression of AD maybe by clearing the damaged mitochondria.

Pathways related to the kinesin complex, intracellular trafficking, vesicular transport and calcium influx were also enriched in the DEPs correlated to DISC1. Stokin et al. found that axonal lesions and defective microtubule-dependent transport are early pathological signs of AD, and that reduction in kinesin-I levels can increase A $\beta$  generation and intraneuronal accumulation [32]. Besides, Murphy et al. demonstrated that the regulation of mitochondrial dynamics by DISC1, which is DISC1 robustly associates with mitochondrial trafficking on microtubule complexes, through multiple protein interaction, including DISC1, NDE1, kinesin complex etc., is a putative risk factor for major mental illness [33]. Furthermore, kinesin is also involved in the transport of mitochondria along axons, which is disrupted

in neurodegenerative diseases [34–37]. Zempel et al. showed that calcium influx is also a significant factor in the pathogenesis of AD [23], which was validated by the enrichment of intracellular trafficking, secretion and vesicular transport by eggNOG analysis in our study. The pathways related to Hsp, aggrephagy and NMDAR were also enriched receptors among the DISC1-interacting proteins. Studies show that Hsp70 and Hsp90 can promote the clearance of A $\beta$  plaques and delay the progression of AD [38–40]. Aggrephagy refers to the selective clearance of protein aggregates by autophagy [41]. The A $\beta$  and tau aggregates are not effectively cleared due to dysfunctional aggrephagy, resulting in the formation of aggresomes that accelerate AD progression. Little is known regarding the mechanisms underlying aggrephagy, although there is evidence indicating that DISC1 can enhance this process [42]. Wang et al. found that the activation of synaptic NMDARs initiates plasticity and promotes neuronal survival, thereby slowing the progression of AD [43].

The other interacting partners of DISC1 identified by the PPI network were GRM3 and PTGER3 (interaction scores 0.630 and 0.627, respectively), which may also regulate DISC1 during AD progression. The GRM3 gene encodes mGluR3, which regulates neuronal and glial functions, as well as neuronal excitability and synaptic transmission [44]. Caraci et al. found that mGluR3 down-regulation and/or inactivation is correlated to impaired cognition in AD. The protective effect of mGluR3 against A $\beta$  toxicity has also been observed in various animal models of AD, suggesting that age-related reduction in mGluR3 may contribute to the increased risk of AD [45]. Furthermore, Jin et al. found that postsynaptic mGluR3 strengthens working memory networks, and its inactivation erodes cognitive abilities [46]. PTGER3 is one of the four receptors of prostaglandin E2 (PGE2), a byproduct of arachidonic acid metabolism in the cyclooxygenase pathway, and is ubiquitously expressed in the brain [47,48]. Studies show that activation of PTGER3 can reduce or suppress cyclic adenosine monophosphate (cAMP) formation and may counteract its up-regulation via PTGER2, which has been linked to the anti-inflammatory effects of PGs. Altered PTGER3 expression in the microglia leads to acute or chronic microglial activation in brain diseases like AD [49].

In conclusion, DISC1 exerts a neuroprotective role during AD progression by interacting with NDE1, KATNA1, GRM3 and PTGER3, and regulating pathways related to microtubule function, mitochondrial dynamics, kinesin complex, calcium ion influx, Hsps, aggrephagy and NMDAR. Our findings will have to be verified by experimental studies. Nevertheless, the present study provides novel insights into the mechanisms driving AD progression, along with potential therapeutic targets that can revolutionize the individualized treatment of AD patients.

### Data Availability

The datasets used and/or analyzed during the current study are available from the corresponding authors on reasonable request.

### Competing Interests

The authors declare that there are no competing interests associated with the manuscript.

### Funding

This work was supported by the National Natural Science Foundation of China [grant number 81901117]; the Natural Science Foundation of Guangdong Province [grant number 2019A1515010926]; the College Students' Science and Technology Innovation Project of Guangzhou Medical University [grant number 2020A024]; and the Health and Technology Project of Guangzhou [grant number 20211A010062].

### CRedit Author Contribution

**Jiajie Lu:** Software, Writing—original draft. **Rihong Huang:** Data curation, Software. **Yuecheng Peng:** Software, Validation, Methodology. **Haojian Wang:** Investigation, Methodology. **Zeja Feng:** Investigation, Methodology. **Yongyang Fan:** Validation, Visualization, Methodology. **Zhaorong Zeng:** Validation, Visualization, Methodology. **Yezhong Wang:** Writing—original draft, Project administration, Writing—review & editing. **Jiana Wei:** Writing—original draft, Project administration, Writing—review & editing. **Zhaotao Wang:** Writing—original draft, Project administration, Writing—review & editing.

### Abbreviations

AD, Alzheimer's disease; APP, amyloid precursor protein; A $\beta$ ,  $\beta$ -amyloid; BP, biological process; CC, cellular component; DDA, data-dependent acquisition; DEP, differentially expressed protein; DISC1, disrupted in schizophrenia 1; eggNOG, non-supervised Orthologous Groups; FDR, false discovery rate; GO, Gene Ontology; GSEA, gene set enrichment analysis; HPLC, high-performance liquid chromatography; Hsp, heat shock protein; iTRAQ, isobaric tag for relative and absolute quantitation; KEGG, Kyoto Encyclopedia of Genes and Genomes; MF, molecular function; MS, mass spectrometry; NFT, neurofibrillary tangle; PPI, protein–protein interaction.

## References

- 1 Alzheimer's Association (2020) Alzheimer's disease facts and figures. *Alzheimers Dement.*, <https://doi.org/10.1002/alz.12068>
- 2 Van Cauwenbergh, C., Van Broeckhoven, C. and Sleegers, K. (2016) The genetic landscape of Alzheimer disease: clinical implications and perspectives. *Genet. Med.* **18**, 421–430, <https://doi.org/10.1038/gim.2015.117>
- 3 Swerdlow, R.H. and Khan, S.M. (2004) A “mitochondrial cascade hypothesis” for sporadic Alzheimer's disease. *Med. Hypotheses* **63**, 8–20, <https://doi.org/10.1016/j.mehy.2003.12.045>
- 4 Swerdlow, R.H., Burns, J.M. and Khan, S.M. (2014) The Alzheimer's disease mitochondrial cascade hypothesis: progress and perspectives. *Biochim. Biophys. Acta* **1842**, 1219–1231, <https://doi.org/10.1016/j.bbadis.2013.09.010>
- 5 Yao, J., Irwin, R.W., Zhao, L. et al. (2009) Mitochondrial bioenergetic deficit precedes Alzheimer's pathology in female mouse model of Alzheimer's disease. *Proc. Natl. Acad. Sci. U.S.A.* **106**, 14670–14675, <https://doi.org/10.1073/pnas.0903563106>
- 6 Lipska, B.K., Peters, T., Hyde, T.M. et al. (2006) Expression of disc1 binding partners is reduced in schizophrenia and associated with disc1 snps. *Hum. Mol. Genet.* **15**, 1245–1258, <https://doi.org/10.1093/hmg/ddl040>
- 7 Bradshaw, N.J. and Porteous, D.J. (2012) Disc1-binding proteins in neural development, signalling and schizophrenia. *Neuropharmacology* **62**, 1230–1241, <https://doi.org/10.1016/j.neuropharm.2010.12.027>
- 8 Wang, Z.T., Lu, M.H., Zhang, Y. et al. (2019) Disrupted-in-schizophrenia-1 protects synaptic plasticity in a transgenic mouse model of Alzheimer's disease as a mitophagy receptor. *Aging Cell* **18**, e12860, <https://doi.org/10.1111/ace1.12860>
- 9 Deng, Q.S., Dong, X.Y., Wu, H. et al. (2016) Disrupted-in-schizophrenia-1 attenuates amyloid- $\beta$  generation and cognitive deficits in app/ps1 transgenic mice by reduction of  $\beta$ -site app-cleaving enzyme 1 levels. *Neuropsychopharmacology* **41**, 440–453, <https://doi.org/10.1038/npp.2015.164>
- 10 Wisniewski, J.R., Zougman, A., Nagaraj, N. et al. (2009) Universal sample preparation method for proteome analysis. *Nat. Methods* **6**, 359–362, <https://doi.org/10.1038/nmeth.1322>
- 11 Wen, B., Du, C., Li, G. et al. (2015) Ipeak: an open source tool to combine results from multiple ms/ms search engines. *Proteomics* **15**, 2916–2920, <https://doi.org/10.1002/prot.201400208>
- 12 Wen, B., Zhou, R., Feng, Q. et al. (2014) Iquant: an automated pipeline for quantitative proteomics based upon isobaric tags. *Proteomics* **14**, 2280–2285, <https://doi.org/10.1002/prot.201300361>
- 13 Szklarczyk, D., Gable, A.L., Lyon, D. et al. (2019) String v11: protein-protein association networks with increased coverage, supporting functional discovery in genome-wide experimental datasets. *Nucleic Acids Res.* **47**, D607–D613, <https://doi.org/10.1093/nar/gky1131>
- 14 Huang, D.W., Sherman, B. and Lempicki, R.J. (2009) Systematic and integrative analysis of large gene lists using david bioinformatics resources. *Nat. Protoc.* **4**, 44–57, <https://doi.org/10.1038/nprot.2008.211>
- 15 Huang, D.W., Sherman, B. and Lempicki, R.J. (2009) Bioinformatics enrichment tools: Paths toward the comprehensive functional analysis of large gene lists. *Nucleic Acids Res.* **37**, 1–13, <https://doi.org/10.1093/nar/gkn923>
- 16 Huerta-Cepas, J., Szklarczyk, D., Forslund, K. et al. (2016) EggnoG 4.5: A hierarchical orthology framework with improved functional annotations for eukaryotic, prokaryotic and viral sequences. *Nucleic Acids Res.* **44**, D286–D293, <https://doi.org/10.1093/nar/gkv1248>
- 17 Subramanian, A., Kuehn, H., Gould, J. et al. (2007) Gsea-p: a desktop application for gene set enrichment analysis. *Bioinformatics* **23**, 3251–3253, <https://doi.org/10.1093/bioinformatics/btm369>
- 18 Subramanian, A., Tamayo, P., Mootha, V. et al. (2005) Gene set enrichment analysis: a knowledge-based approach for interpreting genome-wide expression profiles. *Proc. Natl. Acad. Sci. U.S.A.* **102**, 15545–15550, <https://doi.org/10.1073/pnas.0506580102>
- 19 Yu, G., Wang, L., Han, Y. et al. (2012) Clusterprofiler: an R package for comparing biological themes among gene clusters. *OMICS* **16**, 284–287, <https://doi.org/10.1089/omi.2011.0118>
- 20 Europe, A. (2020) Dementia in Europe yearbook 2019: estimating the prevalence of dementia in Europe. <https://www.alzheimer-europe.org/content/download/195515/1457520/file/FINAL%2005707%20Alzheimer%20Europe%20yearbook%202019.pdf>
- 21 Selkoe, D.J. and Schenk, D. (2003) Alzheimer's disease: molecular understanding predicts amyloid-based therapeutics. *Annu. Rev. Pharmacol. Toxicol.* **43**, 545–584, <https://doi.org/10.1146/annurev.pharmtox.43.100901.140248>
- 22 Kuhlmann, J., Andreasson, U., Pannee, J. et al. (2017) Csf a $\beta$ (1-42) - an excellent but complicated alzheimer's biomarker - a route to standardisation. *Clin. Chim. Acta* **467**, 27–33, <https://doi.org/10.1016/j.cca.2016.05.014>
- 23 Zempel, H. and Mandelkow, E.-M. (2012) Linking amyloid- $\beta$  and tau: Amyloid- $\beta$  induced synaptic dysfunction via local wreckage of the neuronal cytoskeleton. *Neurodegener. Dis.* **10**, 64–72, <https://doi.org/10.1159/000332816>
- 24 Bradshaw, N.J. and Hayashi, M.A. (2017) Nde1 and nde1 from genes to (mal)functions: parallel but distinct roles impacting on neurodevelopmental disorders and psychiatric illness. *Cell. Mol. Life Sci.* **74**, 1191–1210, <https://doi.org/10.1007/s00018-016-2395-7>
- 25 Pei, Z., Lang, B., Frago, Y.D. et al. (2014) The expression and roles of nde1 and nde1 in the adult mammalian central nervous system. *Neuroscience* **271**, 119–136, <https://doi.org/10.1016/j.neuroscience.2014.04.031>
- 26 Ye, F., Kang, E., Yu, C. et al. (2017) Disc1 regulates neurogenesis via modulating kinetochore attachment of nde1/nde1 during mitosis. *Neuron* **96**, 1041–1054 e5, <https://doi.org/10.1016/j.neuron.2017.11.034>
- 27 Lombino, F., Muhia, M., Lopez-Rojas, J. et al. (2019) The microtubule severing protein katanin regulates proliferation of neuronal progenitors in embryonic and adult neurogenesis. *Sci. Rep.* **9**, 15940, <https://doi.org/10.1038/s41598-019-52367-3>
- 28 Dai, C., Luo, T., Luo, S. et al. (2016) P53 and mitochondrial dysfunction: novel insight of neurodegenerative diseases. *J. Bioenerg. Biomembr.* **48**, 337–347, <https://doi.org/10.1007/s10863-016-9669-5>
- 29 Chen, H. and Chan, D.J. (2009) Mitochondrial dynamics—fusion, fission, movement, and mitophagy—in neurodegenerative diseases. *Hum. Mol. Genet.* **18**, R169–R176, <https://doi.org/10.1093/hmg/ddp326>

- 30 Cha, M., Han, S., Son, S. et al. (2012) Mitochondria-specific accumulation of amyloid  $\beta$  induces mitochondrial dysfunction leading to apoptotic cell death. *PLoS ONE* **7**, e34929, <https://doi.org/10.1371/journal.pone.0034929>
- 31 Maruszak, A. and Zekanowski, C. (2011) Mitochondrial dysfunction and Alzheimer's disease. *Prog. Neuropsychopharmacol. Biol. Psychiatry* **35**, 320–330, <https://doi.org/10.1016/j.pnpbp.2010.07.004>
- 32 Stokin, G.B., Lillo, C., Falzone, T.L. et al. (2005) Axonopathy and transport deficits early in the pathogenesis of alzheimer's disease. *Science* **307**, 1282–1288, <https://doi.org/10.1126/science.1105681>
- 33 Murphy, L.C. and Millar, J.K. (2017) Regulation of mitochondrial dynamics by disc1, a putative risk factor for major mental illness. *Schizophr. Res.* **187**, 55–61, <https://doi.org/10.1016/j.schres.2016.12.027>
- 34 Chen, Y. and Sheng, Z.J.T. (2013) Kinesin-1-syntaphilin coupling mediates activity-dependent regulation of axonal mitochondrial transport. *J. Cell Biol.* **202**, 351–364, <https://doi.org/10.1083/jcb.201302040>
- 35 Chaturvedi, R. and Flint Beal, M. (2013) Mitochondrial diseases of the brain. *Free Radic. Biol. Med.* **63**, 1–29, <https://doi.org/10.1016/j.freeradbiomed.2013.03.018>
- 36 Brickley, K. and Stephenson, F. (2011) Trafficking kinesin protein (trak)-mediated transport of mitochondria in axons of hippocampal neurons. *J. Biol. Chem.* **286**, 18079–18092, <https://doi.org/10.1074/jbc.M111.236018>
- 37 Chen, H. and Chan, D.C. (2009) Mitochondrial dynamics—fusion, fission, movement, and mitophagy—in neurodegenerative diseases. *Hum. Mol. Genet.* **18**, R169–R176, <https://doi.org/10.1093/hmg/ddp326>
- 38 Magrané, J., Smith, R., Walsh, K. et al. (2004) Heat shock protein 70 participates in the neuroprotective response to intracellularly expressed beta-amyloid in neurons. *J. Neurosci.* **24**, 1700–1706
- 39 Kakimura, J., Kitamura, Y., Takata, K. et al. (2002) Microglial activation and amyloid-beta clearance induced by exogenous heat-shock proteins. *FASEB J.* **16**, 601–603, <https://doi.org/10.1096/fj.01-0530fje>
- 40 Hoshino, T., Murao, N., Namba, T. et al. (2011) Suppression of Alzheimer's disease-related phenotypes by expression of heat shock protein 70 in mice. *J. Neurosci.* **31**, 5225–5234, <https://doi.org/10.1523/JNEUROSCI.5478-10.2011>
- 41 Øverbye, A., Fengsrud, M. and Seglen, P. (2007) Proteomic analysis of membrane-associated proteins from rat liver autophagosomes. *Autophagy* **3**, 300–322, <https://doi.org/10.4161/auto.3910>
- 42 Malampati, S., Song, J.X., Chun-Kit Tong, B. et al. (2020) Targeting aggrephagy for the treatment of Alzheimer's disease. *Cells* **9**, 311, <https://doi.org/10.3390/cells9020311>
- 43 Wang, R. and Reddy, P.H. (2017) Role of glutamate and nmda receptors in Alzheimer's disease. *J. Alzheimers Dis.* **57**, 1041–1048, <https://doi.org/10.3233/JAD-160763>
- 44 Niswender, C.M. and Conn, P.J. (2010) Metabotropic glutamate receptors: Physiology, pharmacology, and disease. *Annu. Rev. Pharmacol. Toxicol.* **50**, 295–322, <https://doi.org/10.1146/annurev.pharmtox.011008.145533>
- 45 Caraci, F., Molinaro, G., Battaglia, G. et al. (2011) Targeting group ii metabotropic glutamate (mglu) receptors for the treatment of psychosis associated with Alzheimer's disease: selective activation of mglu2 receptors amplifies beta-amyloid toxicity in cultured neurons, whereas dual activation of mglu2 and mglu3 receptors is neuroprotective. *Mol. Pharmacol.* **79**, 618–626, <https://doi.org/10.1124/mol.110.067488>
- 46 Jin, L.E., Wang, M., Galvin, V.C. et al. (2018) Mglur2 versus mglur3 metabotropic glutamate receptors in primate dorsolateral prefrontal cortex: postsynaptic mglur3 strengthen working memory networks. *Cereb. Cortex* **28**, 974–987, <https://doi.org/10.1093/cercor/bhx005>
- 47 Nakamura, K., Kaneko, T., Yamashita, Y. et al. (2000) Immunohistochemical localization of prostaglandin ep3 receptor in the rat nervous system. *J. Comp. Neurol.* **421**, 543–569, [https://doi.org/10.1002/\(SICI\)1096-9861\(20000612\)421:4%3c543::AID-CNE6%3e3.0.CO;2-3](https://doi.org/10.1002/(SICI)1096-9861(20000612)421:4%3c543::AID-CNE6%3e3.0.CO;2-3)
- 48 Narumiya, S., Sugimoto, Y. and Ushikubi, F. (1999) Prostanoid receptors: structures, properties, and functions. *Physiol. Rev.* **79**, 1193–1226, <https://doi.org/10.1152/physrev.1999.79.4.1193>
- 49 Slawik, H., Volk, B., Fiebich, B. et al. (2004) Microglial expression of prostaglandin ep3 receptor in excitotoxic lesions in the rat striatum. *Neurochem. Int.* **45**, 653–660, <https://doi.org/10.1016/j.neuint.2004.04.007>
